# Supplementary material for: Resolution of a Configurationally Stable Hetero[4]helicene
Source: MDPI journal article supplement (doi:10.3390/molecules27041160), 2022-02-09
Supplement: s1 [file s1]

# Resolution of a Configurationally Stable Hetero[4]helicene

Michela Lupi <sup>1</sup>, Martina Onori <sup>1</sup>, Stefano Menichetti <sup>1</sup>, Sergio Abbate <sup>2</sup>, Giovanna Longhi <sup>2</sup> and Caterina Viglianisi <sup>1,\*</sup>

<sup>1</sup> Department of Chemistry "Ugo Schiff" (DICUS), University of Florence, Via della Lastruccia 13, Sesto Fiorentino (FI), 50019 Florence, Italy; michela.lupi@unifi.it (M.L.); martinaonori@gmail.com (M.O.); stefano.menichetti@unifi.it (S.M.)

<sup>2</sup> Department of Molecular and Translational Medicine (DMMT), University of Brescia, V.le Europa 11 Brescia (BS), 25121 Brescia, Italy; sergio.abbate@unibs.it (S.A.); giovanna.longhi@unibs.it (G.L.)

\* Correspondence: caterina.viglianisi@unifi.it

## HPLC Analysis

The HPLC resolution of products was performed on a HPLC Waters Alliance 2695 equipped with a 200  $\mu$ L loop injector and a spectrophotometer UV Waters PDA 2996.

CHIRALPAK® IA (250 x 4.6 mm/ 5 $\mu$ m) purchased from Chiral Technologies Europe.

The mobile phase, delivered at a flow rate 1.2 mL/min, was hexane/CH<sub>2</sub>Cl<sub>2</sub> 70/30 v/v + 1% MeOH.

Racemate

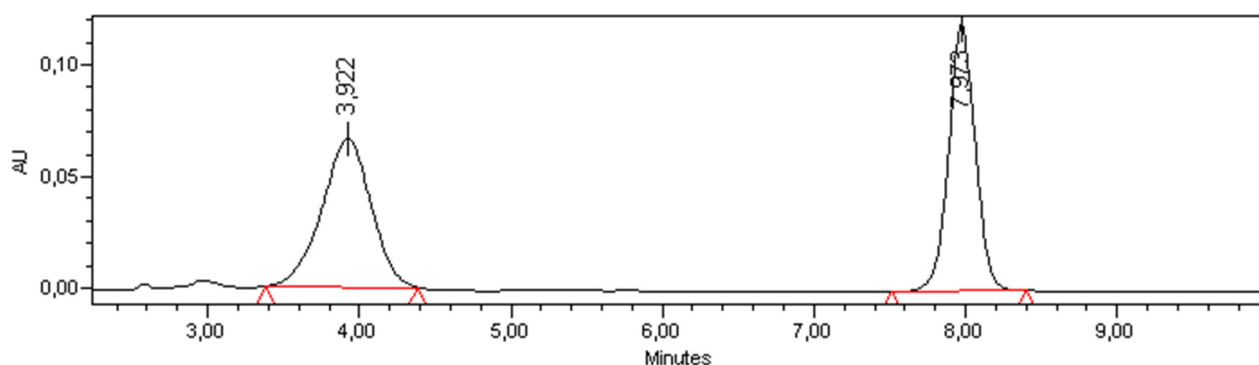

| 1b(OH) Racemic | Retention time (min) | %Area |
|----------------|----------------------|-------|
| (+)            | 3.922                | 50.88 |
| (-)            | 7.973                | 49.12 |

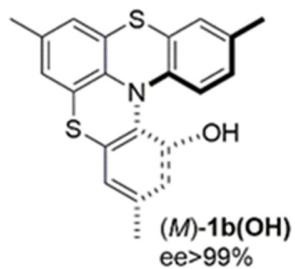

| $[\alpha]_D^{20} -167$                    |                      |        |
|-------------------------------------------|----------------------|--------|
| (c 0.1, CH <sub>2</sub> Cl <sub>2</sub> ) | Retention time (min) | %Area  |
| <b>(M)-1b(OH) (-)</b>                     | 8.001                | 100.00 |

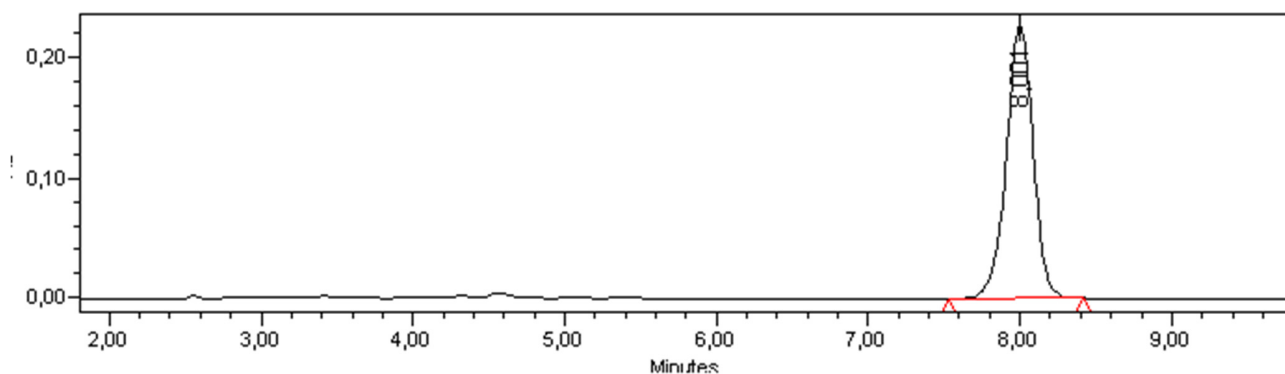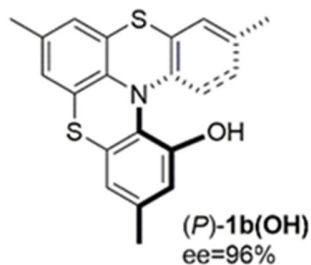

| $[\alpha]_D^{20} +166$                    |                      |       |
|-------------------------------------------|----------------------|-------|
| (c 0.1, CH <sub>2</sub> Cl <sub>2</sub> ) | Retention time (min) | %Area |
| <b>(P)-1b(OH) (+)</b>                     | 3.799                | 97.80 |
| <b>(M)-1b(OH) (-)</b>                     | 8.611                | 2.20  |

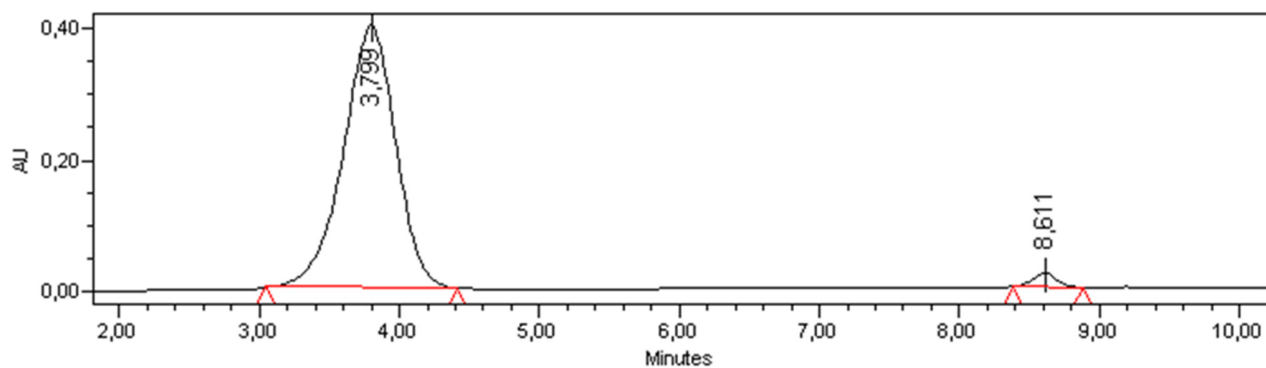

# NMR spectra 400 MHz

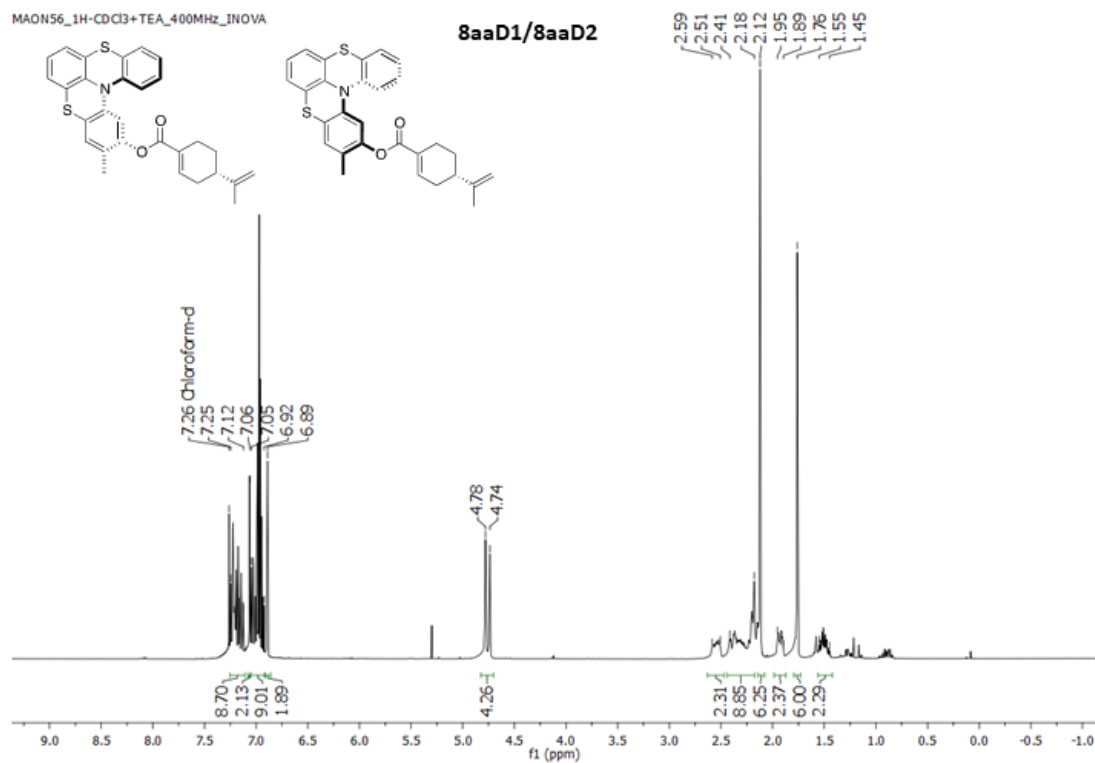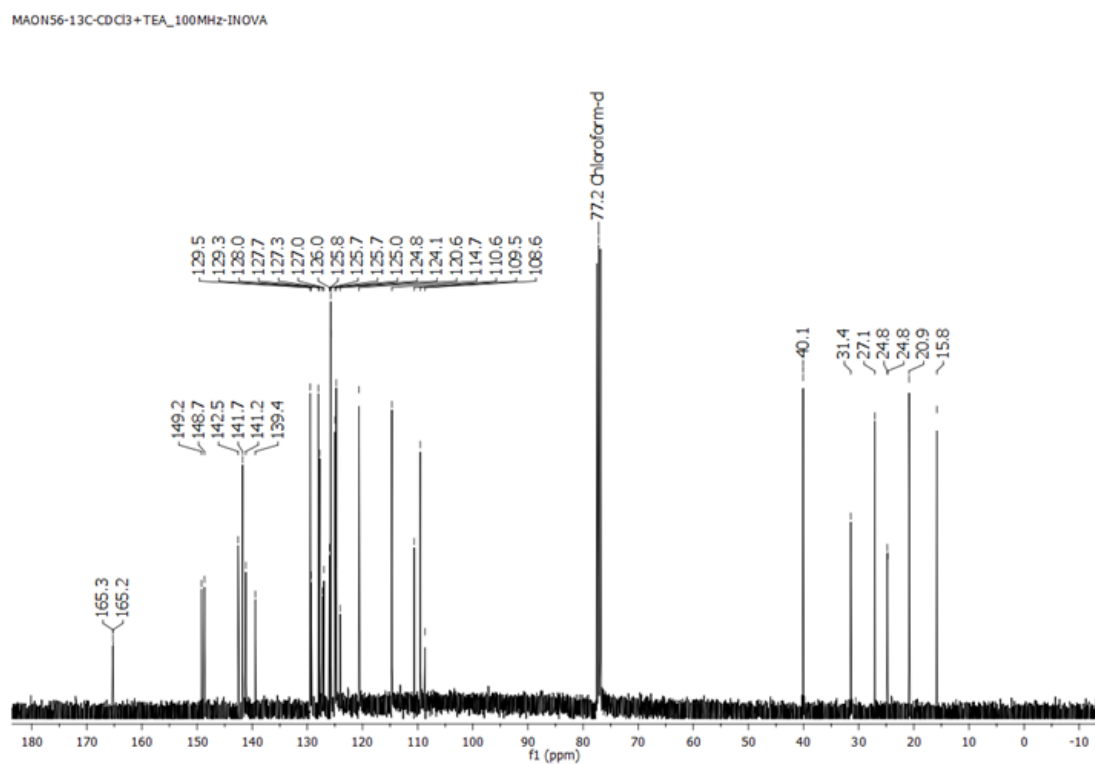

MAON53-f2-1H-400MHz-CDCl3

8abD1/8abD2

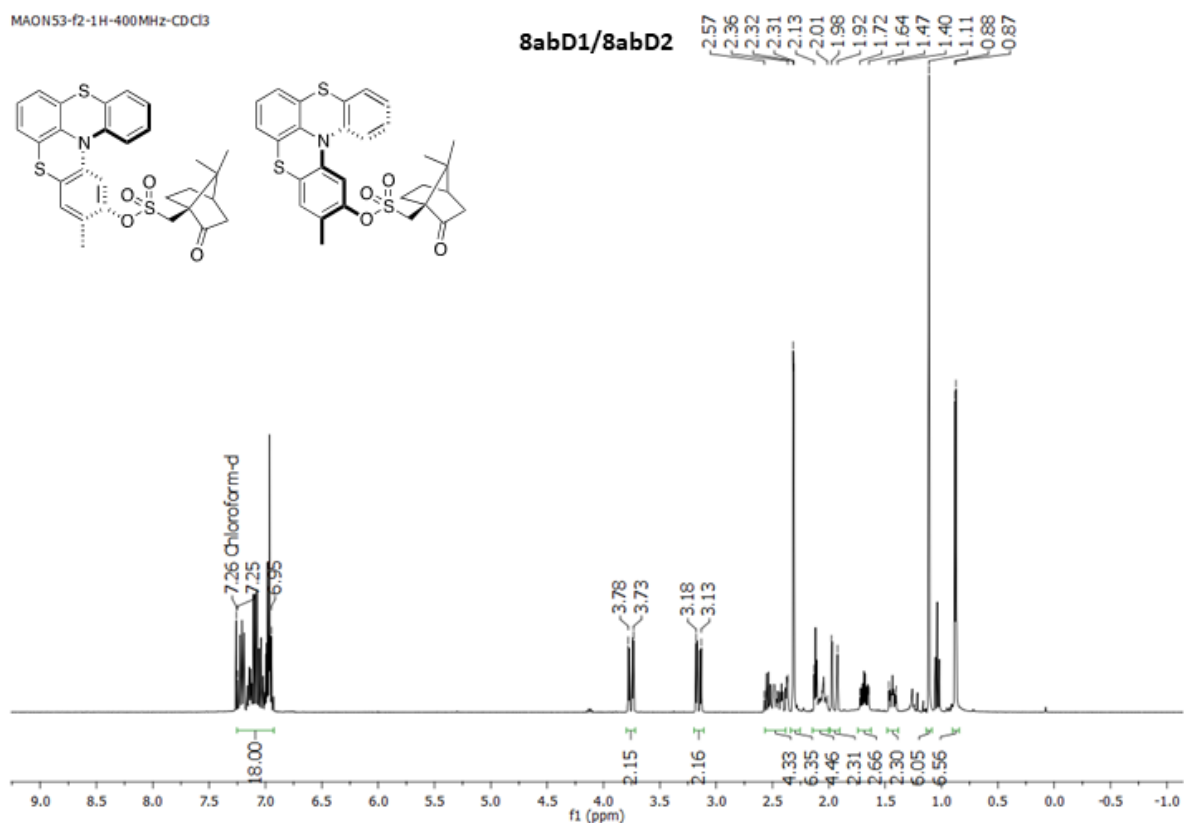

MAON53\_f2\_28-48\_CDCl3\_TEA\_13C\_400MHz

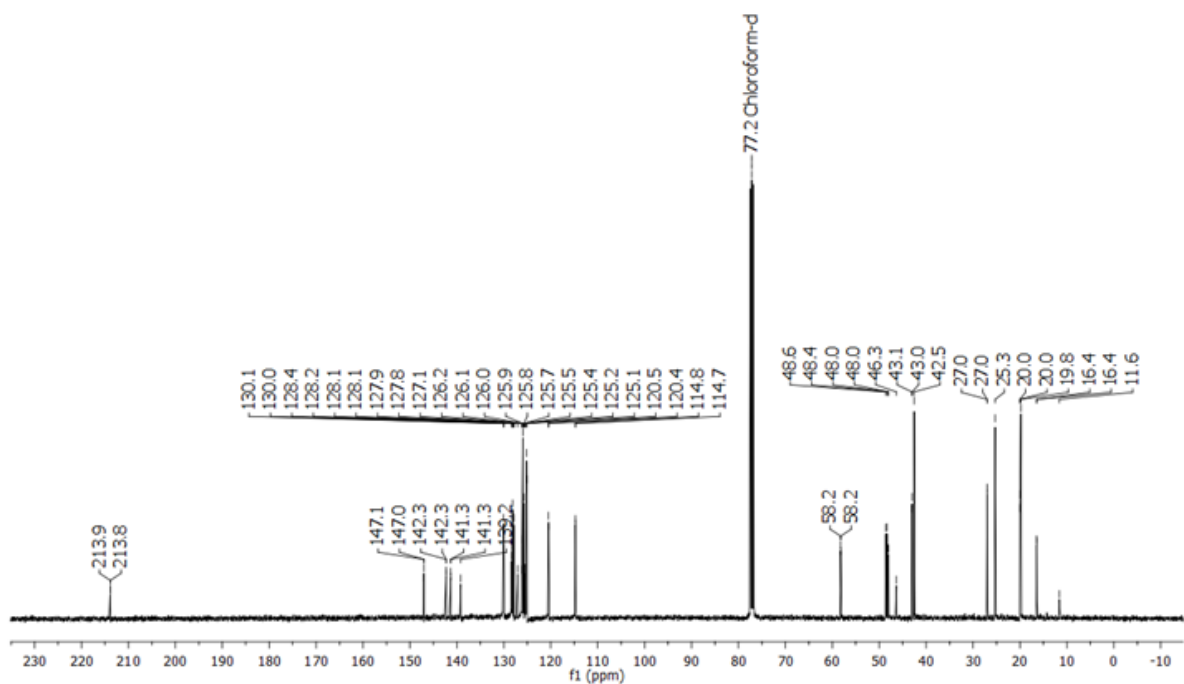

LM215\_F2\_CDCl3\_1HNMR\_400MHz

8acD1/8acD2

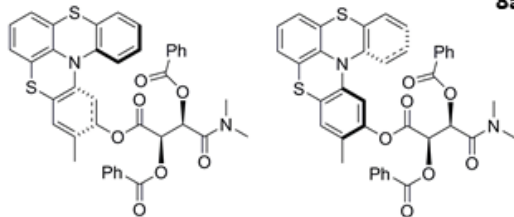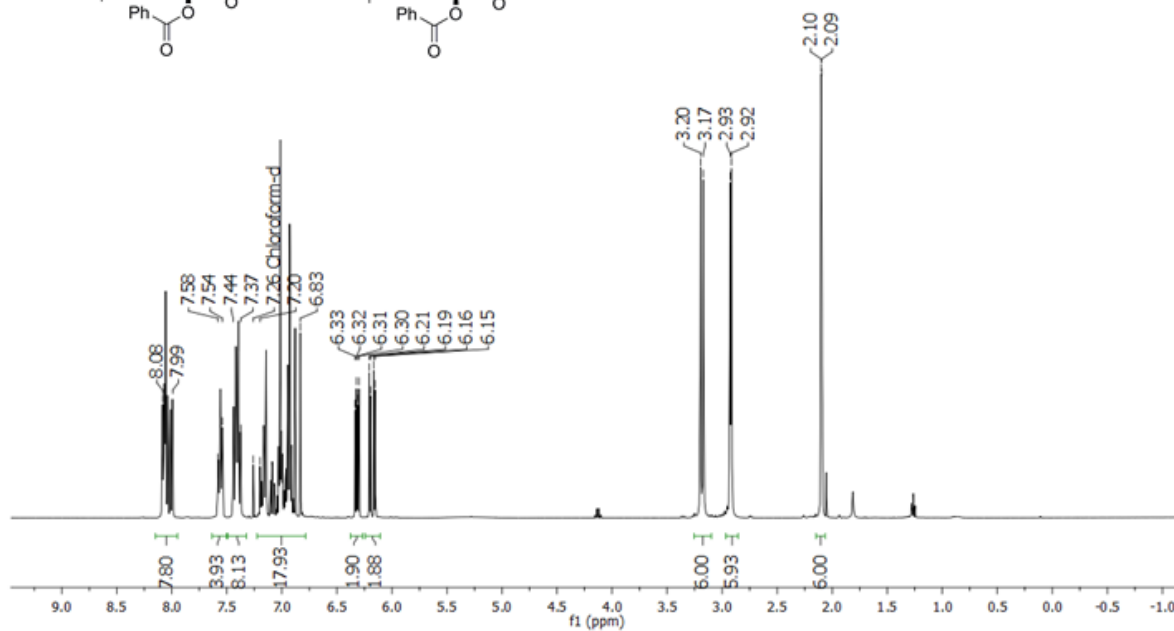

LM215\_F2\_CDCl3\_13CNMR\_100MHz

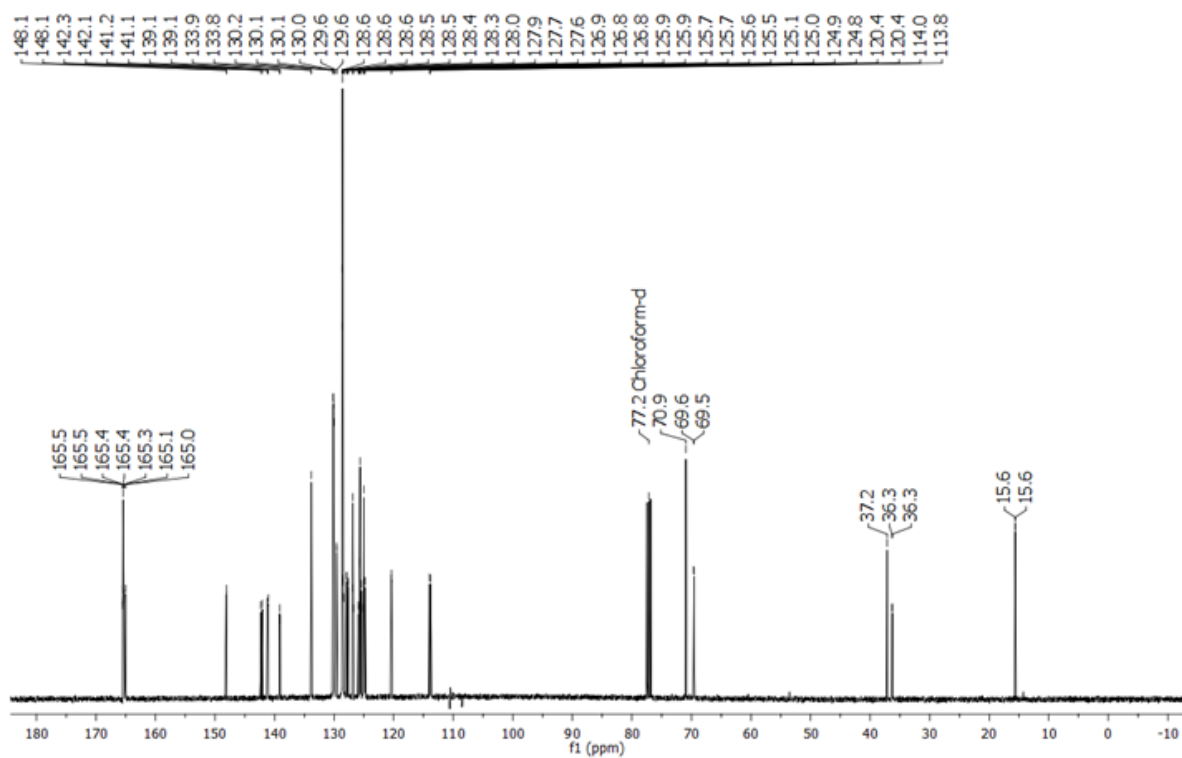

MAON68-f1\_1H-CDCl3+TEA\_400MHZ-INOVA

8adD1/8adD2

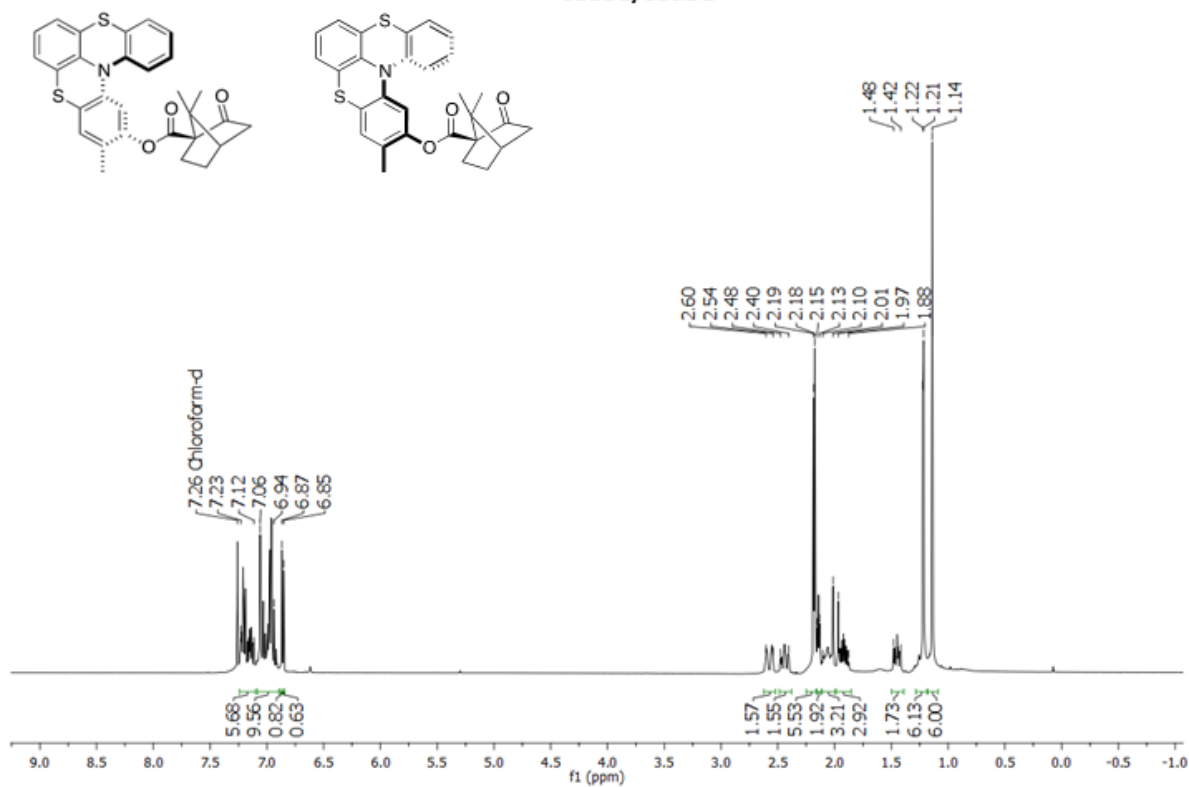

MAON68-f1\_13C-CDCl3+TEA\_100MHZ-INOVA

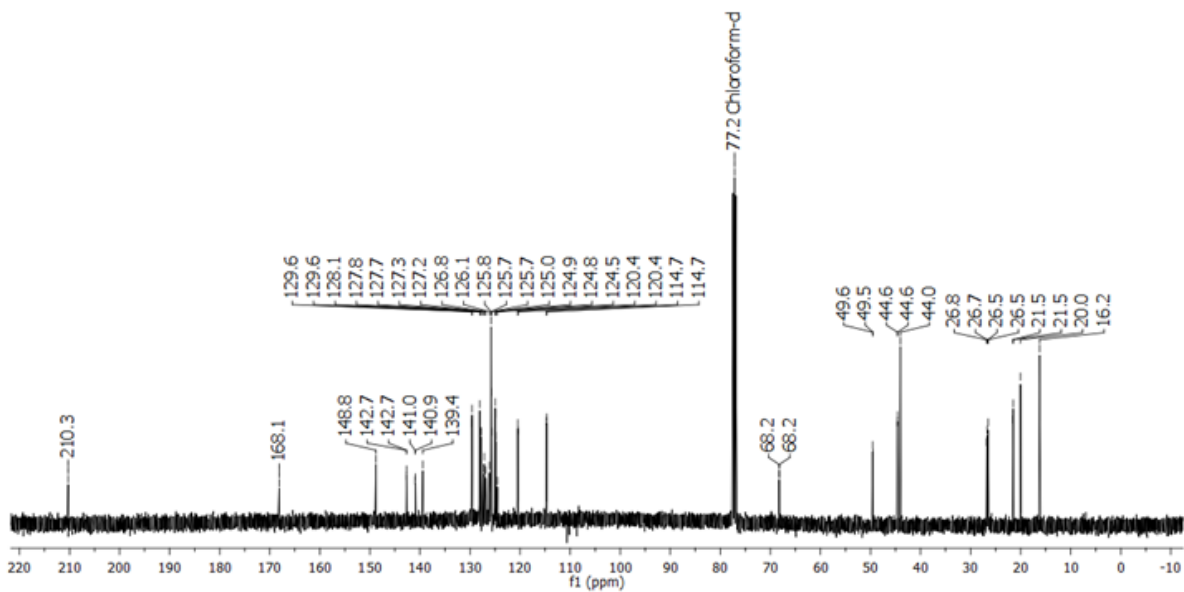

MAON8-CDCl<sub>3</sub>-TEA\_400MHz-INOVA

8aeD1/8aeD2

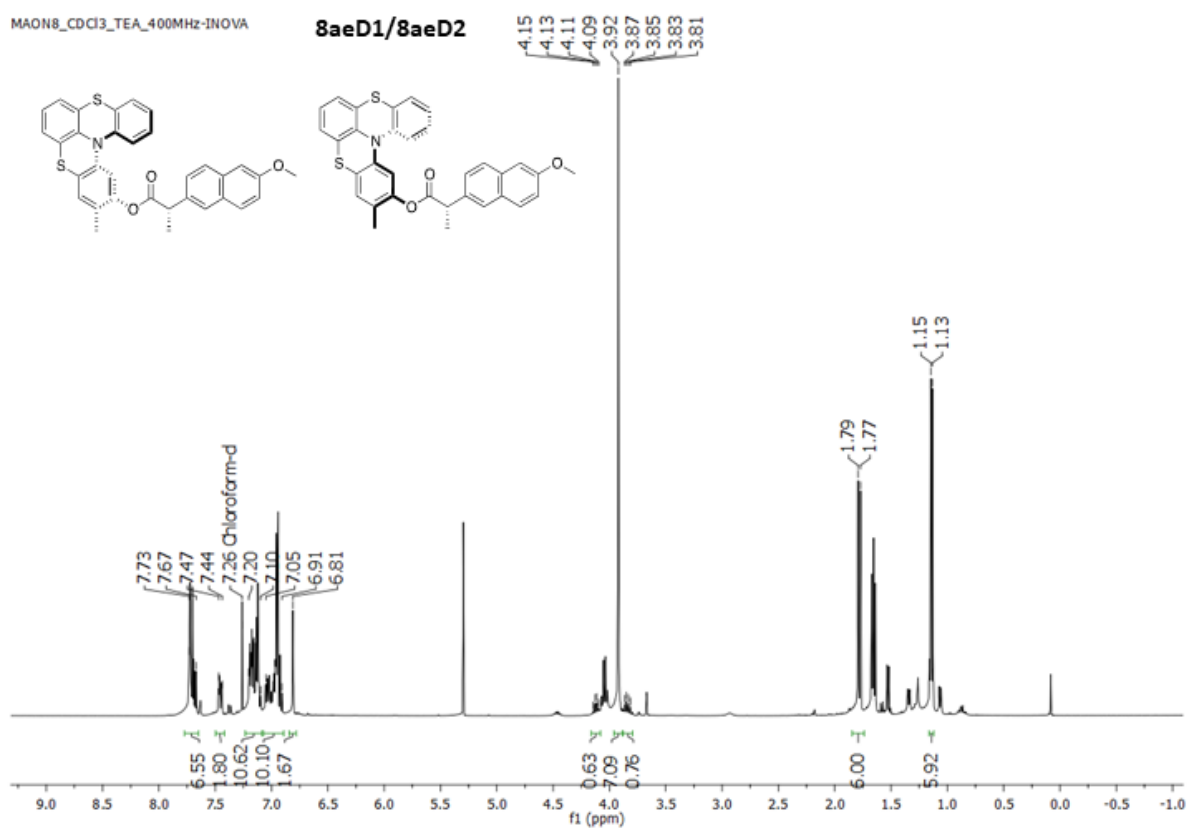

MAON8-CDCl<sub>3</sub>+TEA\_100MHz-INOVA

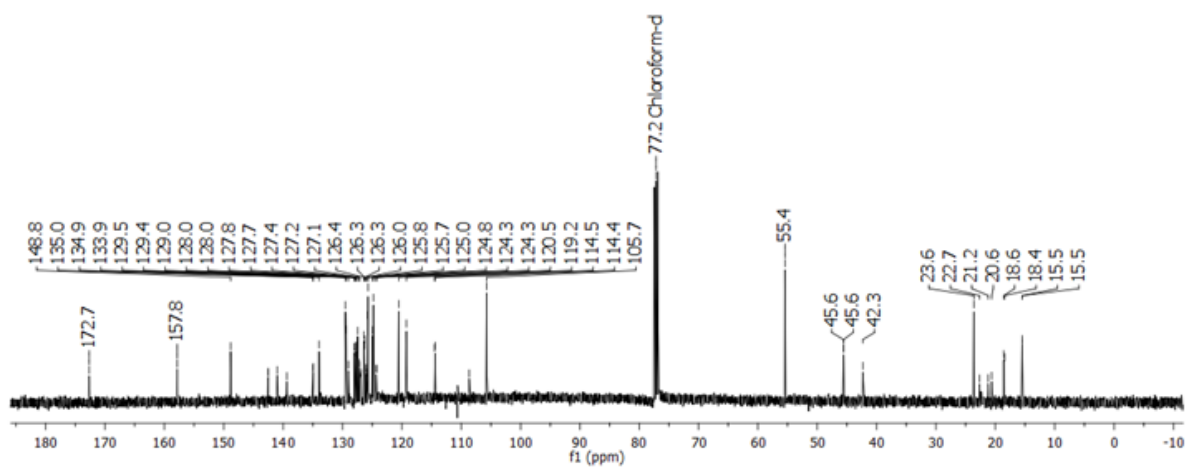

LM219-2col-F3-CDCl<sub>3</sub>-1H NMR-400MHz

8afD1/8afD2

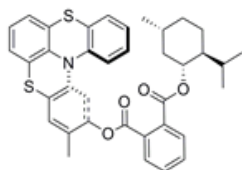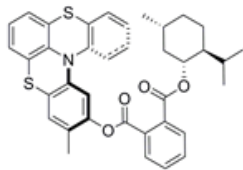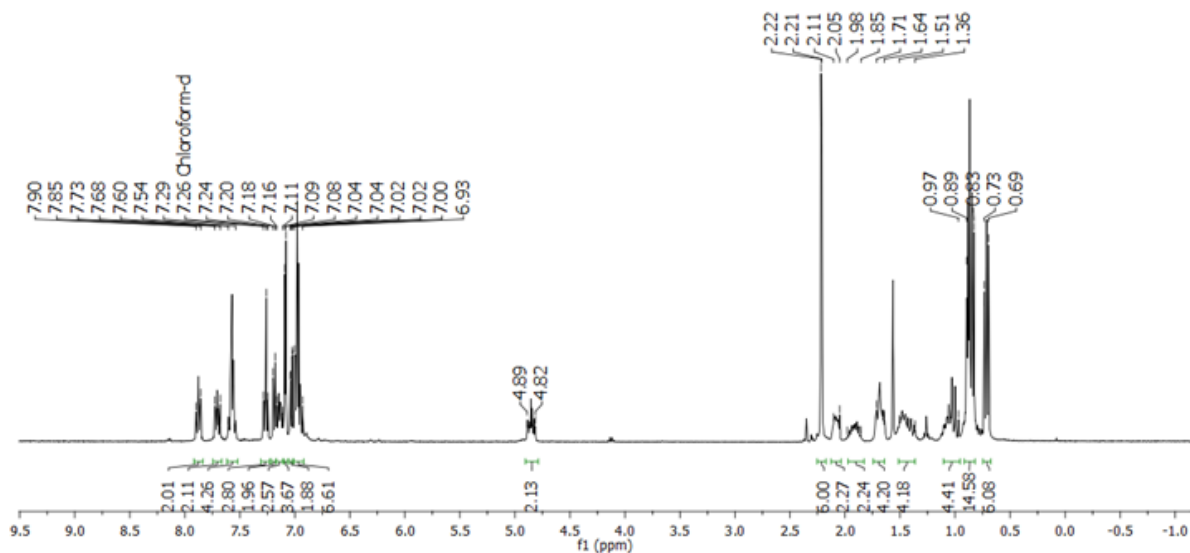

LM219-2col-F3-CDCl<sub>3</sub>-<sup>13</sup>C NMR-100MHz

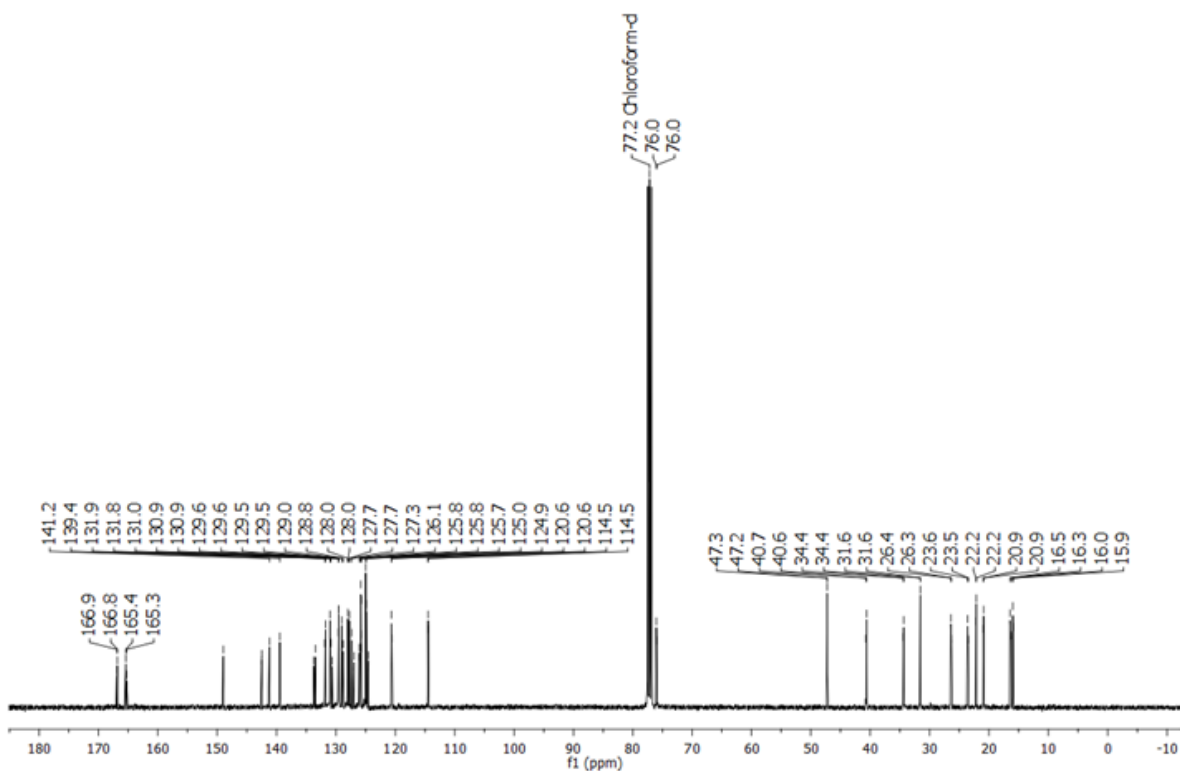



8agD1/8agD2

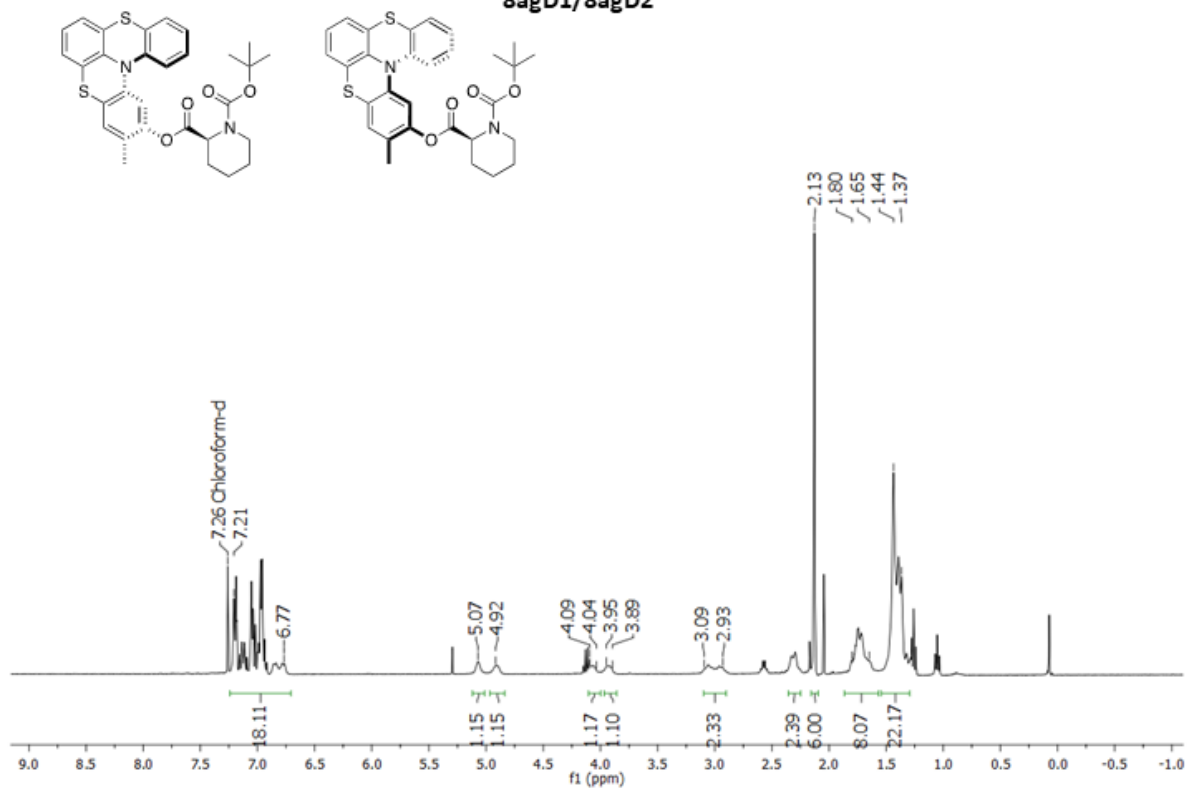

MAON87\_f1\_1H\_400MHz\_CDCl3+TEA

8ahD1/8ahD2

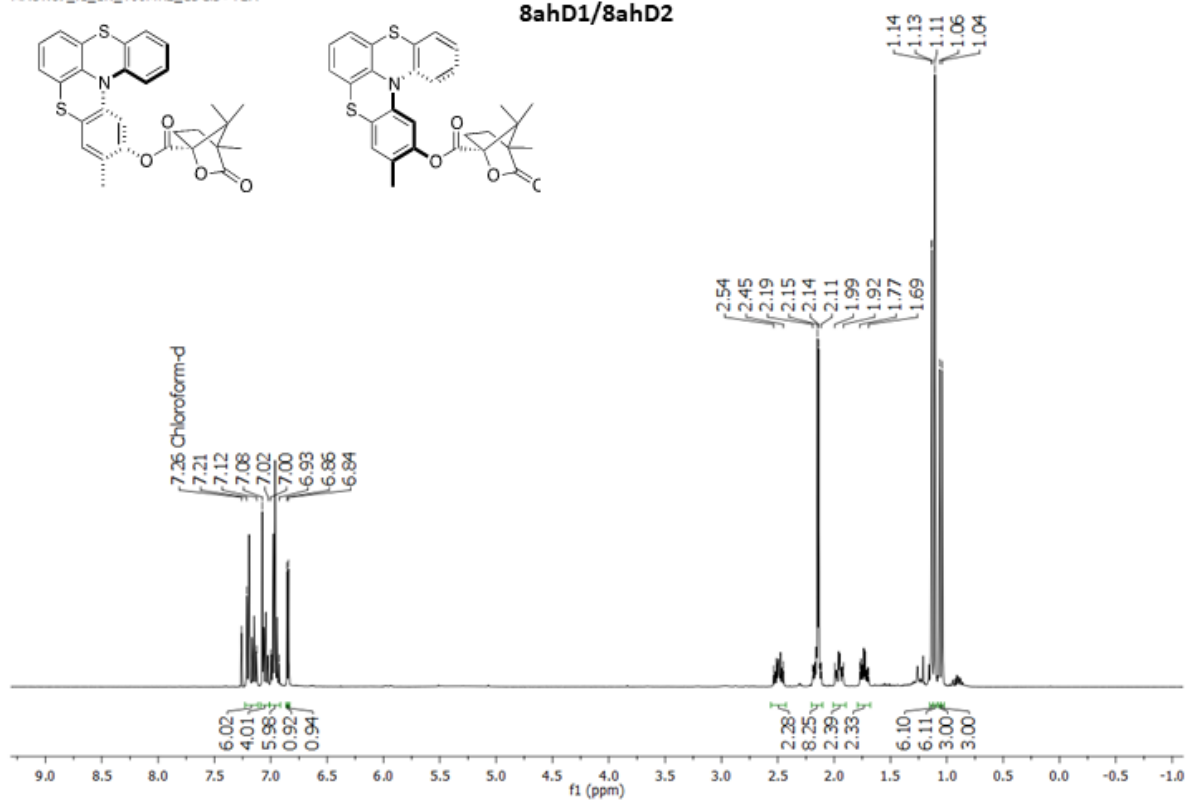

MAON87-f1-13C-100MHz-CDCl3

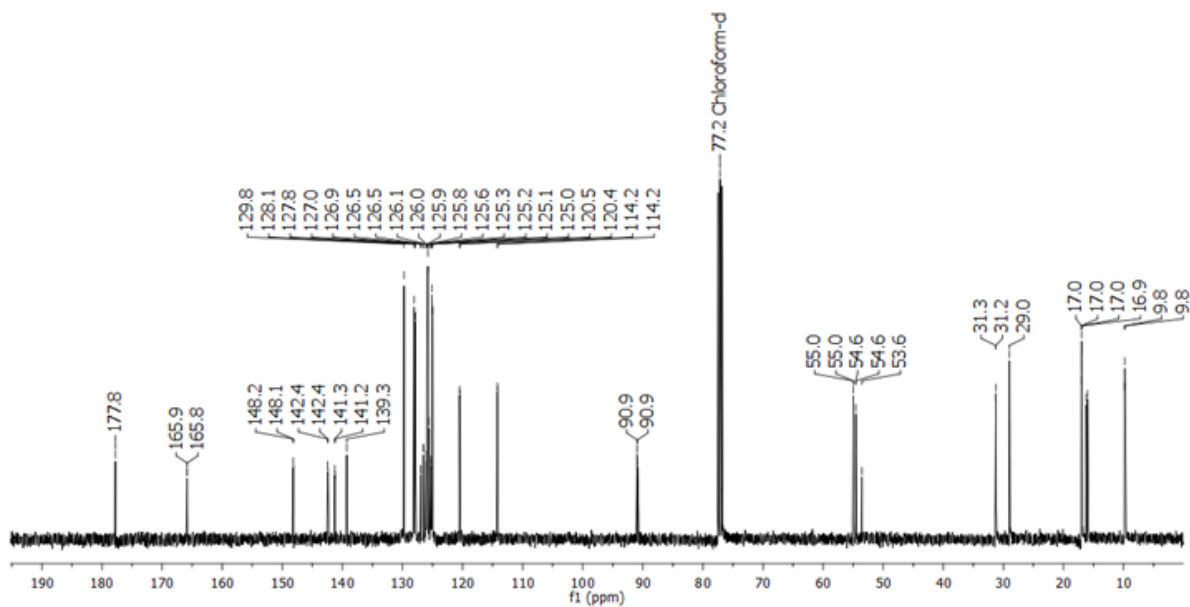

8bdD1/8bdD2

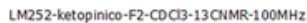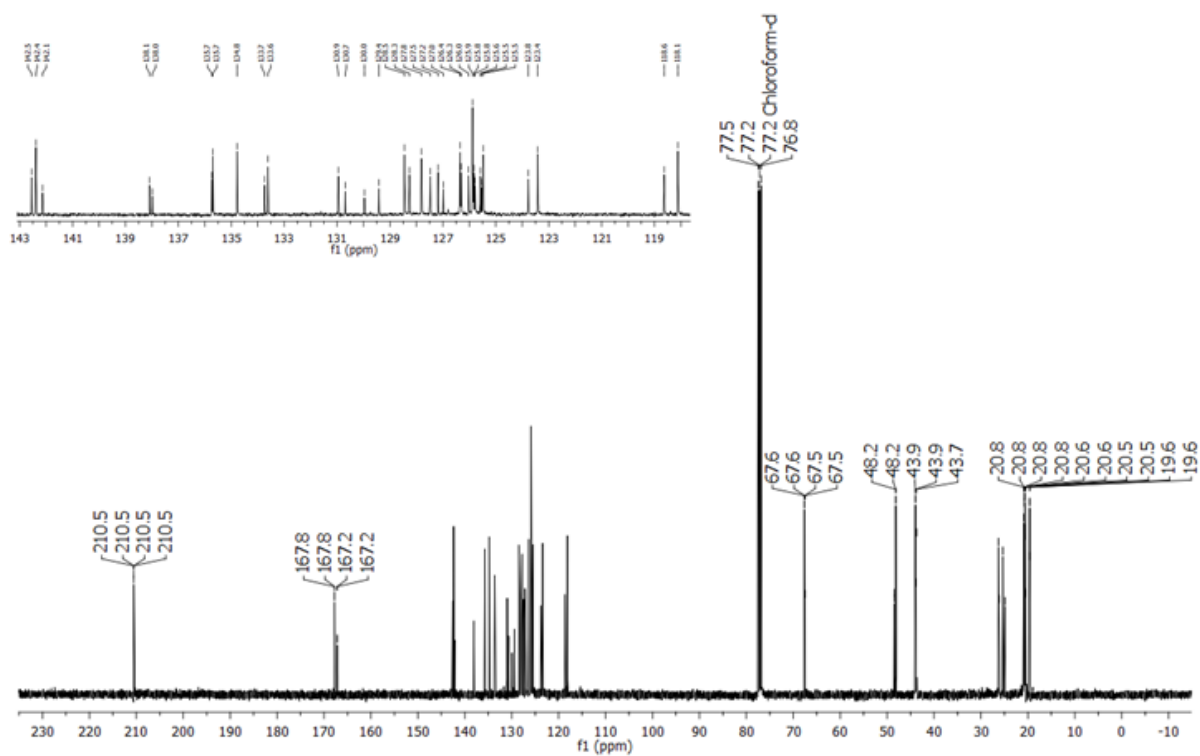

## 8beD1/8beD2

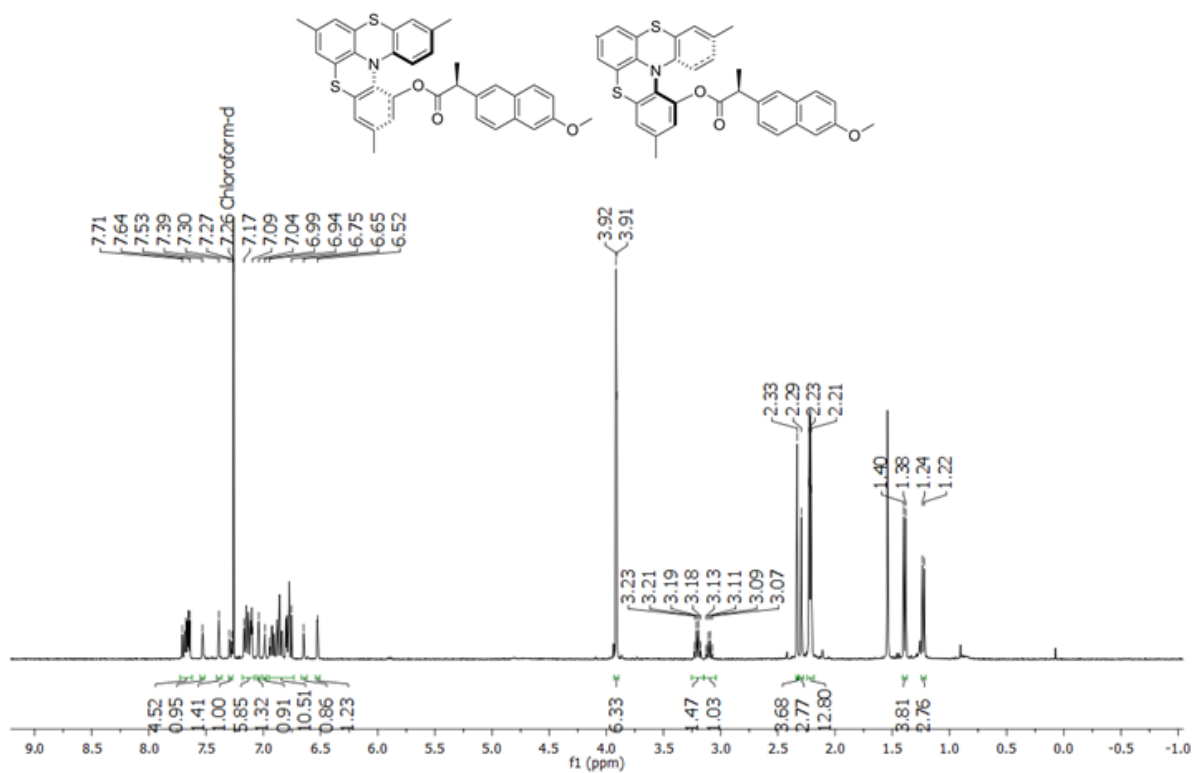

LM244-F3-1H NMR-CDCl3-400MHz

8bfD1/8bfD2

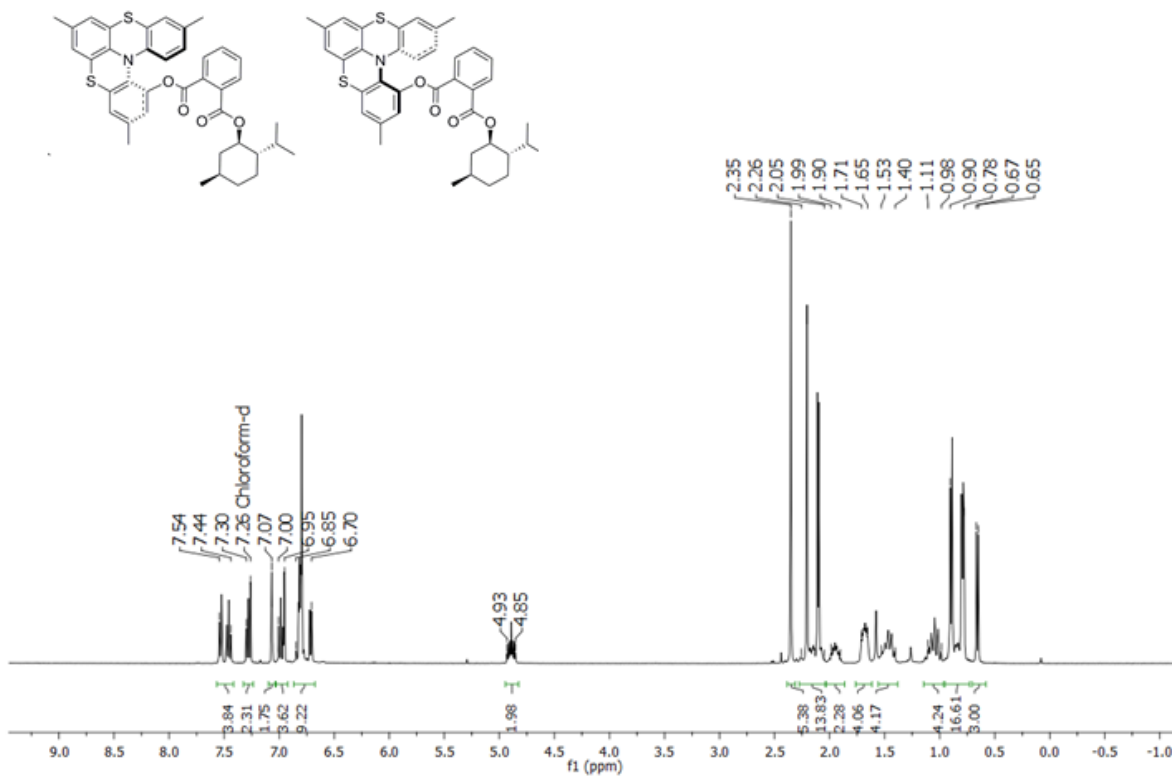

LM244-F3-13C NMR-CDCl3-100MHz

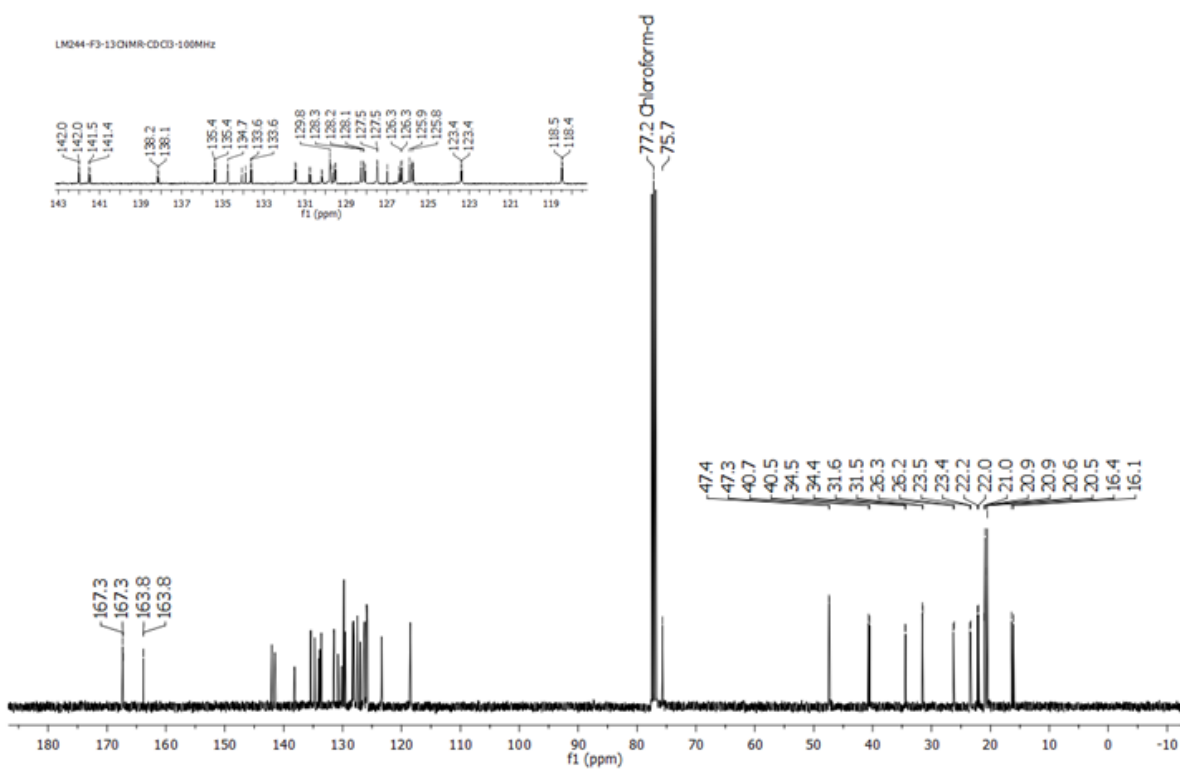

LM242-F1-CDCl3-1H NMR-400MHz

(-)-8bgD1

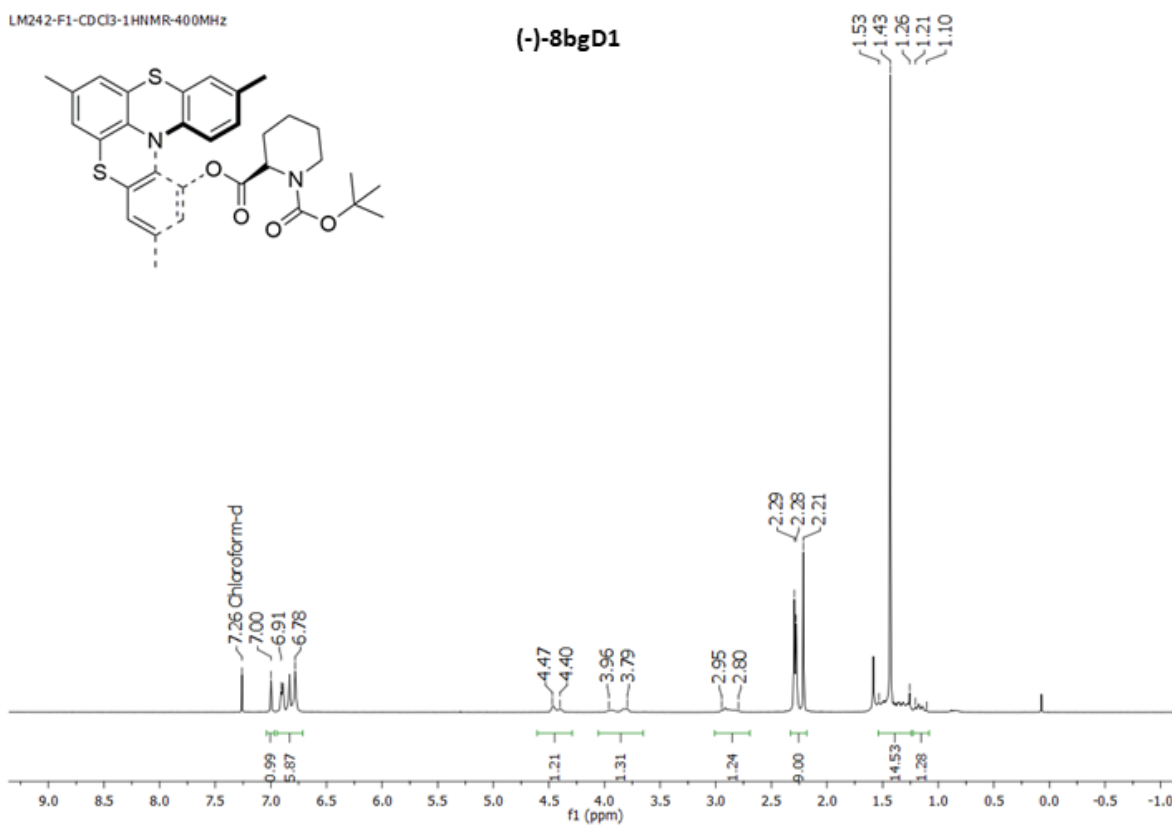

LM242-F1-CDCl3-13C NMR-100MHz-weekend

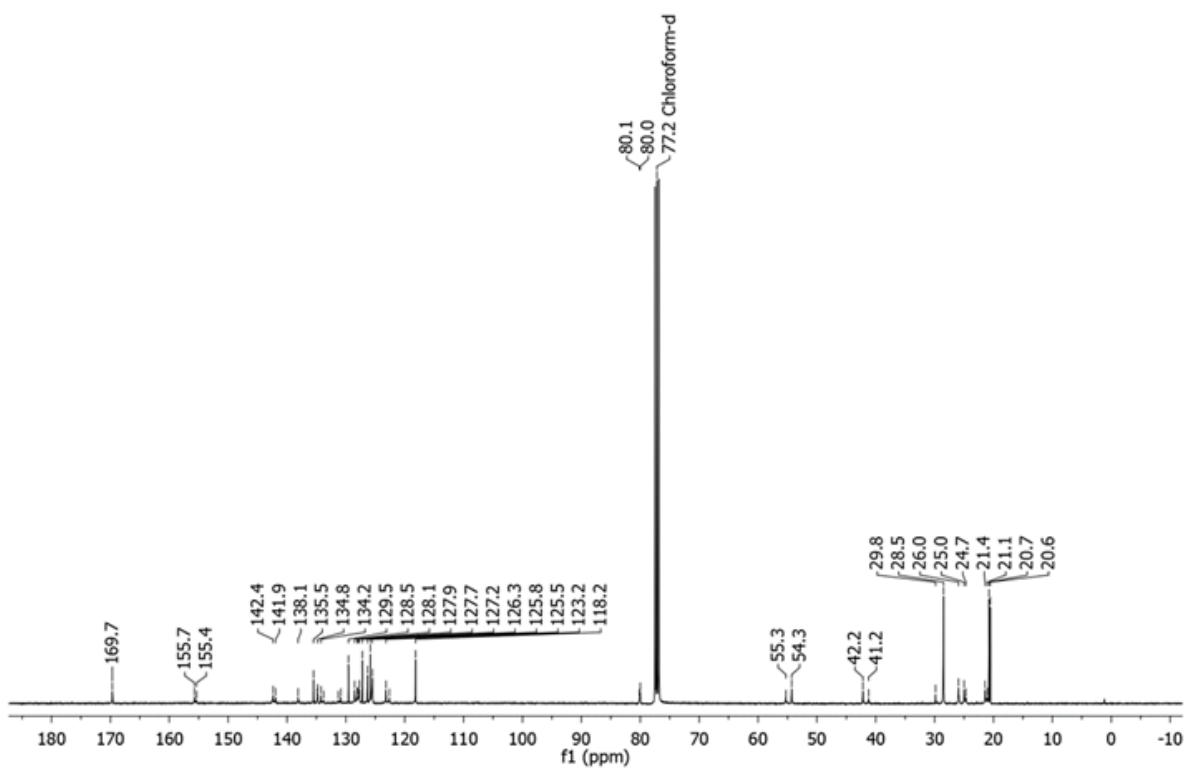

LM242-F2-CDCl3-1H NMR-400MHz

(+)-8bgD2

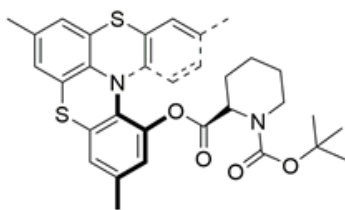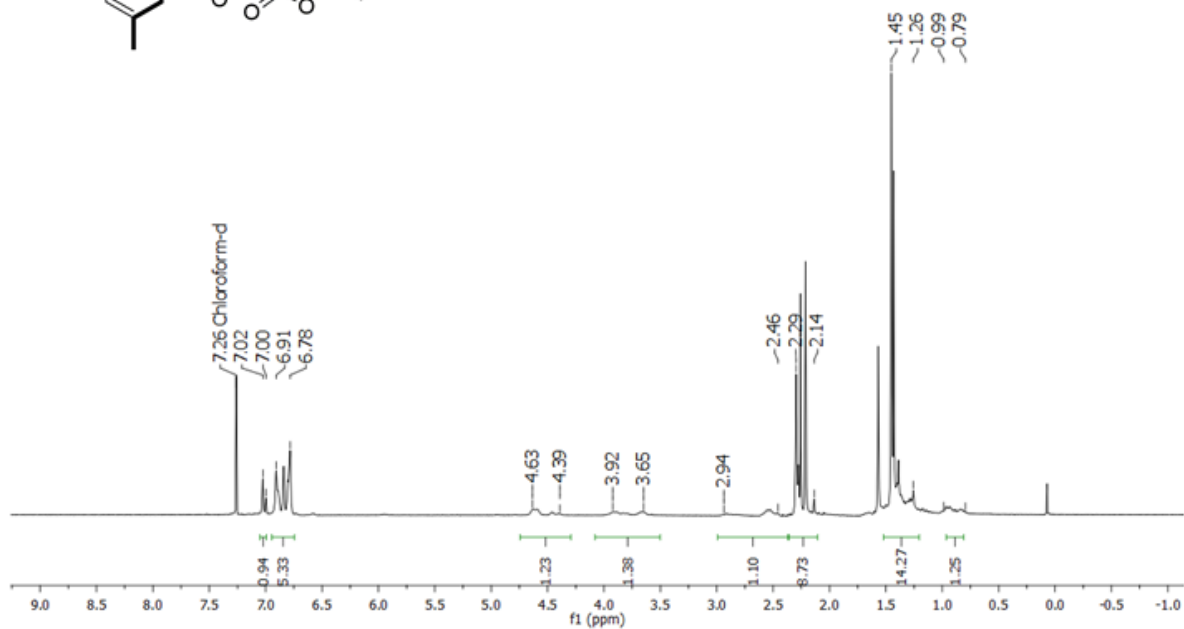

LM325\_F3-CDCl3-13CNMR-100MHz

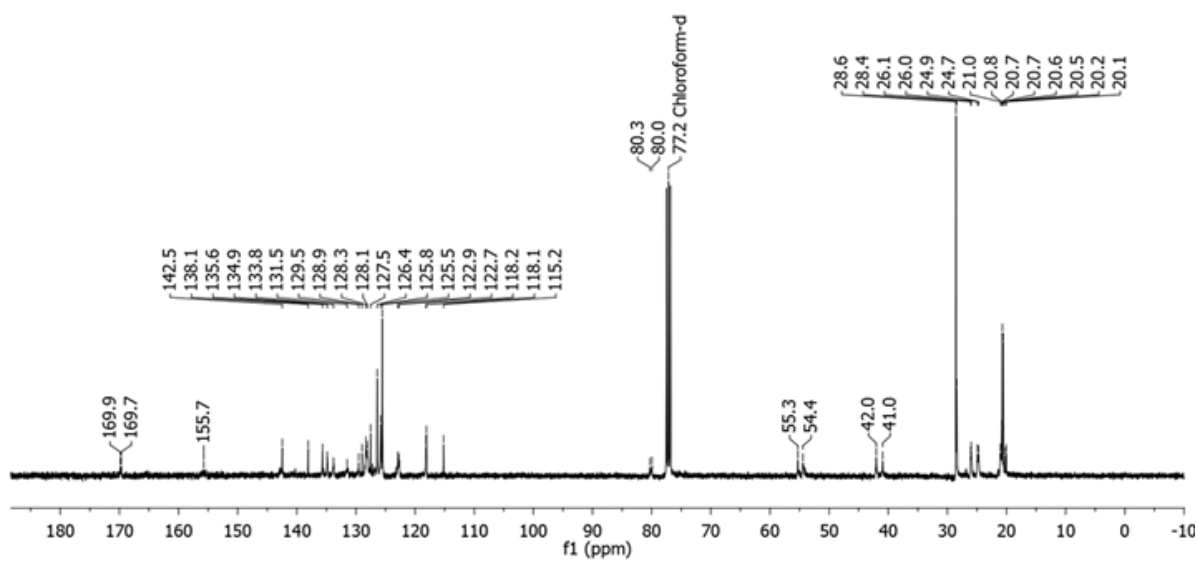

LM251-F3-CDCl<sub>3</sub>-1H NMR-400MHz

(-)-8bHD1

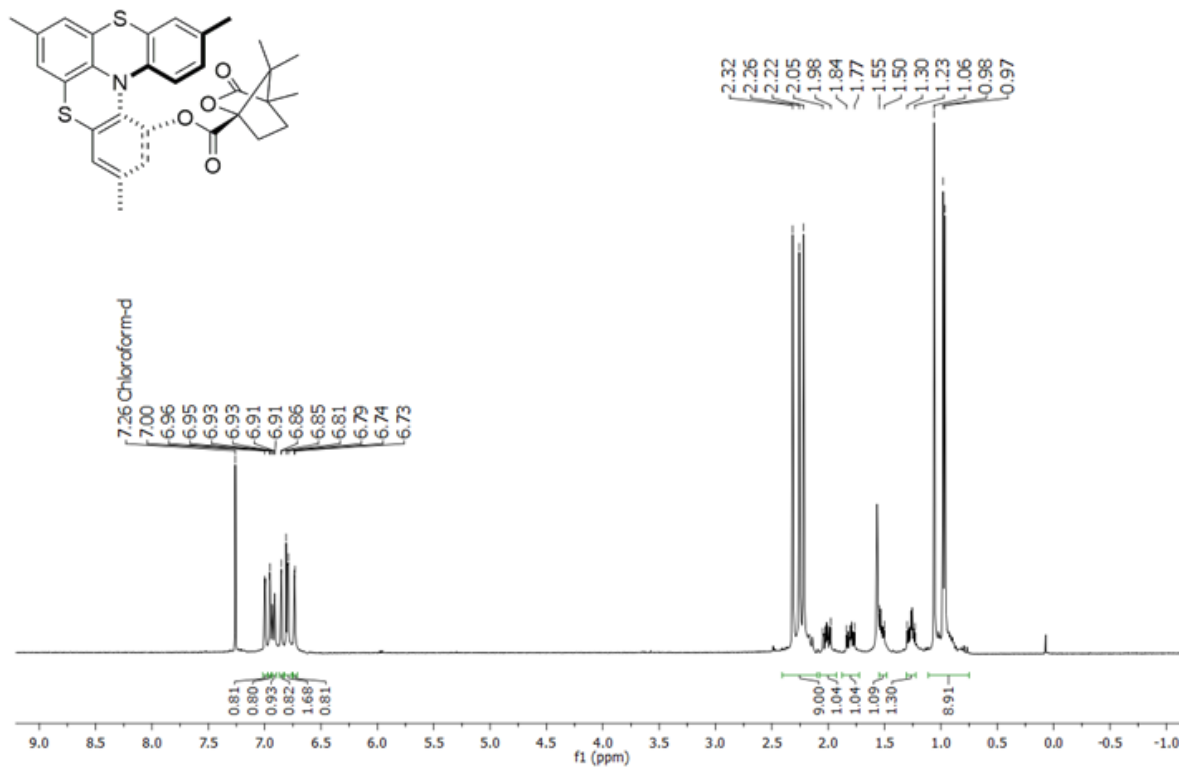

LM251-F3-CDCl<sub>3</sub>-<sup>13</sup>C NMR-100MHz

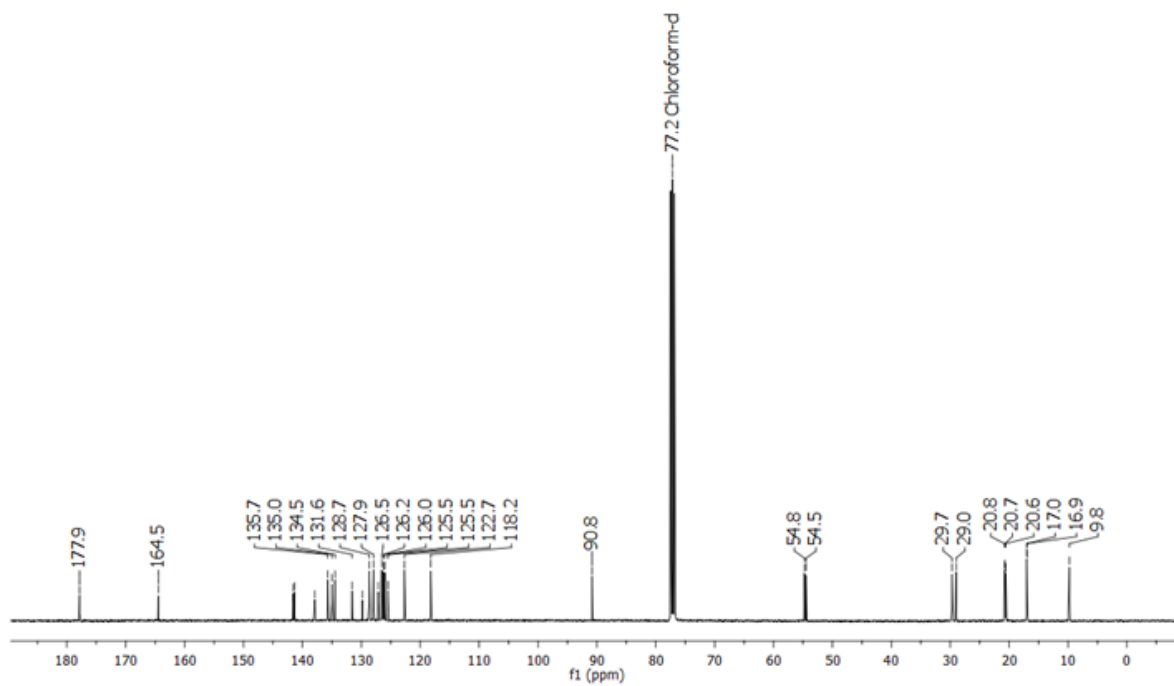



LM251-2diastero-F5-CDCl3-1HNMR-400MHz

(+)-8ahD2

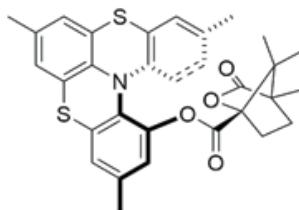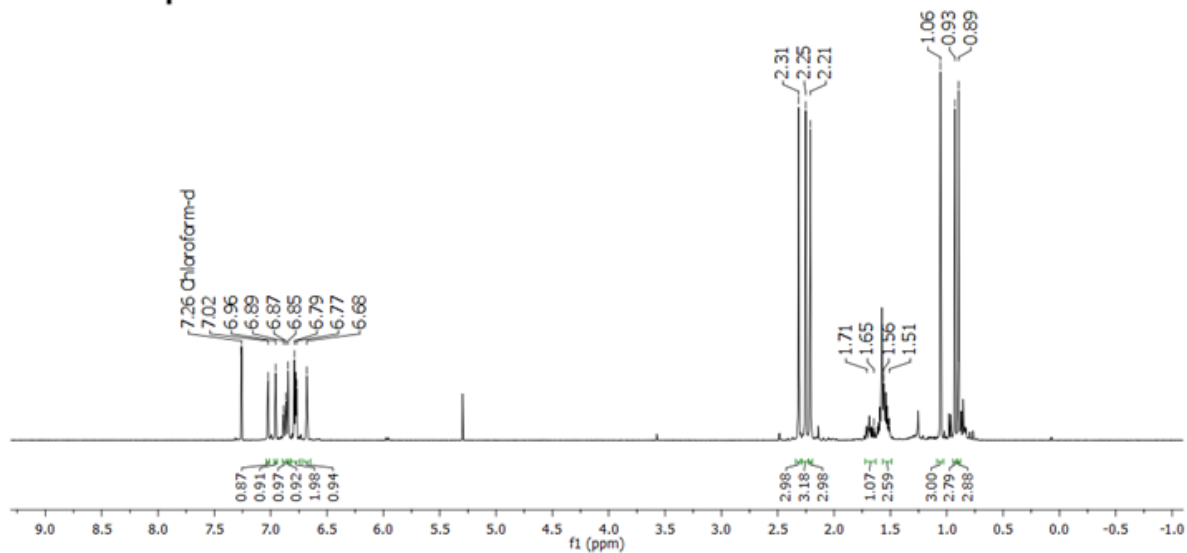

LM251-2diastero-F5-CDCl3-13CNMR-100MHz

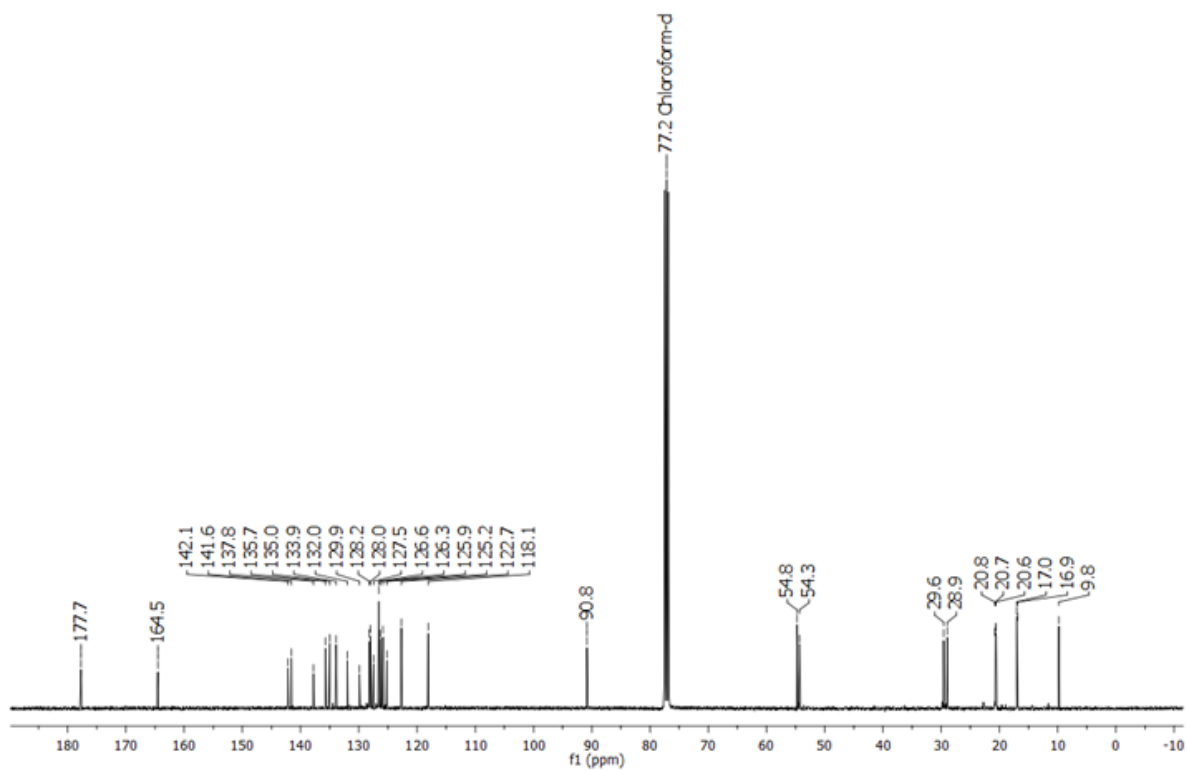

## DFT calculations of compound 1b(OH)

The 3D-structures of compound **1b(OH)** in its *M* form have been optimized by DFT calculations and thereafter the CD and absorption spectra have been evaluated considering M06 and M06-2X functionals, the solvent has been treated at ieefpcm level. Two conformers have been found with energy and population values reported in the following Table.

Table S1. Energy and Boltzmann population values for the two conformers reported in Figure 4 of the text

|              | Kcal/mole | pop   | G<br>Kcal/mole | pop   |
|--------------|-----------|-------|----------------|-------|
| <b>M062X</b> |           |       |                |       |
| <b>B</b>     | 1.38      | 8.8%  | 1.26           | 10.6% |
| <b>A</b>     | 0.00      | 91.2% | 0.00           | 89.4% |
| <b>M06</b>   |           |       |                |       |
| <b>B</b>     | 1.06      | 14.3% | 0.83           | 19.7% |
| <b>A</b>     | 0.00      | 85.7% | 0.00           | 80.3% |

Spectra have been simulated as superpositions of Gaussian-shaped bands, assuming 0.2 eV-bandwidths. The calculated average spectra are reported in Figure 5 in the text; below we report the calculated spectra of each conformer. A wavelength shift of +4 nm has been applied for the M06 calculation, of +26 nm for the M06-2X calculation: the applied shift has been chosen such as to maximize the similarity index S.I. introduced by as recommended in [Kuppens, T.; Langenaeker, W.; Tollenaere, J. P.; Bultinck, P. J. Phys. Chem. A 2003, 107, 542–553]. The similarity index obtained for the M06 calculated CD spectrum of Figure 5 in the text is 0.81 (0.96 for the absorption spectrum), the similarity index for the M062X CD spectrum is 0.76 (0.98 for the absorption spectrum).

CD and absorption experimental and calculated spectra with two choices of the DFT functional, both conformers are presented considering *M*-1b(OH).

Calculated spectra are presented for the two conformers A and B.

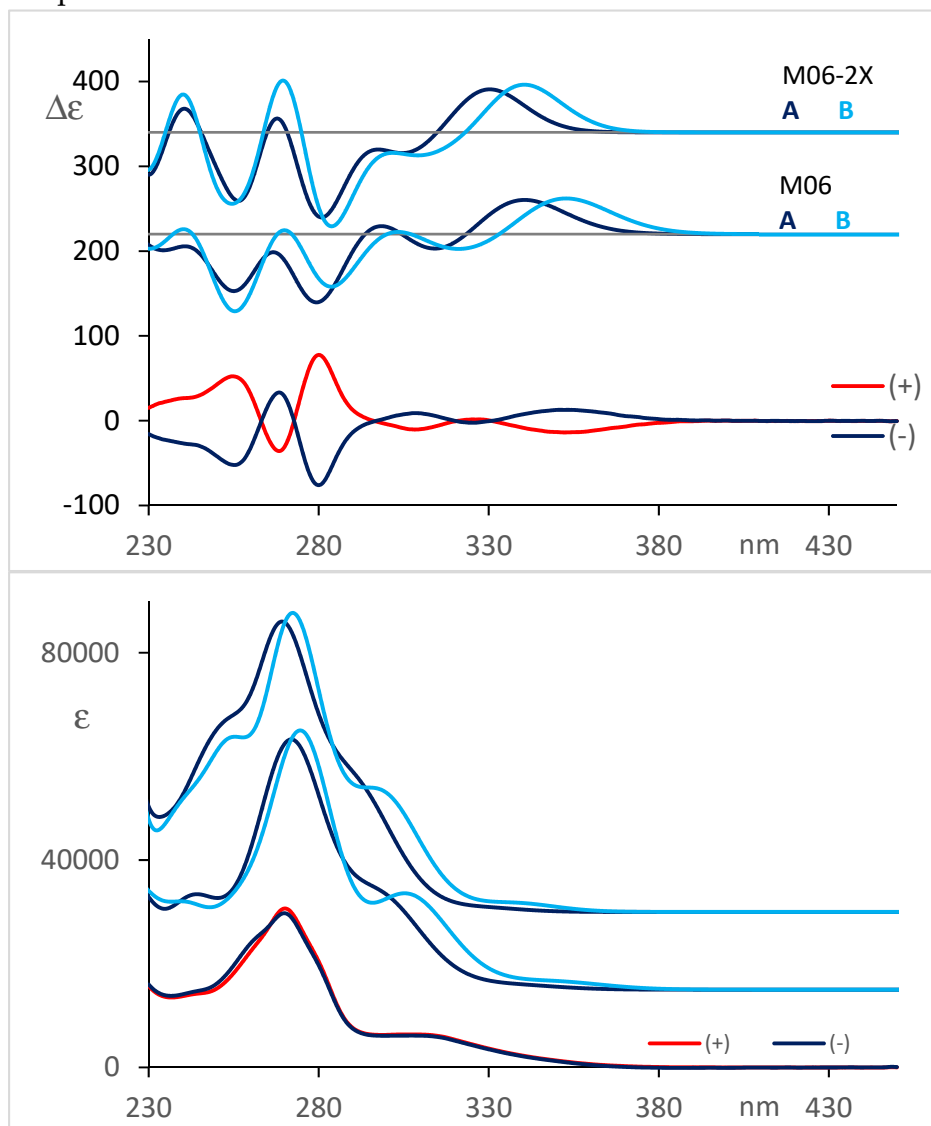

## Optimized structures' coordinates.

### Conformer A M06

| Center<br>Number | Atomic<br>Number | Atomic<br>Type | Coordinates (Angstroms) |           |           |
|------------------|------------------|----------------|-------------------------|-----------|-----------|
|                  |                  |                | X                       | Y         | Z         |
| 1                | 6                | 0              | 4.150720                | -1.048962 | 0.283855  |
| 2                | 6                | 0              | 3.234180                | -1.762657 | 1.042086  |
| 3                | 6                | 0              | 1.888342                | -1.437703 | 1.028100  |
| 4                | 6                | 0              | 1.417702                | -0.423713 | 0.186894  |
| 5                | 6                | 0              | 2.347584                | 0.320986  | -0.525347 |
| 6                | 6                | 0              | 3.699366                | 0.022213  | -0.475326 |
| 7                | 6                | 0              | -0.918811               | -1.114251 | -0.184706 |
| 8                | 6                | 0              | -0.620896               | -2.190656 | -1.008074 |
| 9                | 6                | 0              | -2.207839               | -0.995979 | 0.327951  |
| 10               | 6                | 0              | -1.583581               | 1.592994  | 0.670678  |
| 11               | 6                | 0              | -0.377619               | 1.215997  | 0.097420  |
| 12               | 6                | 0              | 0.370311                | 2.174936  | -0.573569 |
| 13               | 1                | 0              | 4.402918                | 0.632165  | -1.029937 |
| 14               | 6                | 0              | -1.588767               | -3.135915 | -1.291380 |
| 15               | 6                | 0              | -3.179824               | -1.929123 | 0.009084  |
| 16               | 1                | 0              | -4.182346               | -1.804876 | 0.403627  |
| 17               | 6                | 0              | -2.881358               | -3.023988 | -0.790769 |
| 18               | 7                | 0              | 0.037050                | -0.129365 | 0.154547  |
| 19               | 6                | 0              | -2.016457               | 2.907536  | 0.613133  |
| 20               | 6                | 0              | -0.040726               | 3.497965  | -0.588630 |
| 21               | 6                | 0              | -1.235222               | 3.882688  | 0.007816  |
| 22               | 1                | 0              | -2.973674               | 3.171929  | 1.047666  |
| 23               | 1                | 0              | 0.569458                | 4.236669  | -1.096493 |
| 24               | 6                | 0              | -1.665197               | 5.314093  | 0.000799  |
| 25               | 16               | 0              | -2.567640               | 0.336456  | 1.449475  |
| 26               | 16               | 0              | 1.801616                | 1.694196  | -1.505806 |
| 27               | 6                | 0              | -3.915216               | -4.060944 | -1.090669 |
| 28               | 1                | 0              | -3.783568               | -4.473807 | -2.091100 |
| 29               | 1                | 0              | -3.851148               | -4.894823 | -0.387683 |
| 30               | 1                | 0              | -4.922994               | -3.652545 | -1.018655 |
| 31               | 6                | 0              | 5.597802                | -1.421440 | 0.297061  |
| 32               | 1                | 0              | 5.906716                | -1.781575 | 1.278591  |
| 33               | 1                | 0              | 5.799375                | -2.222695 | -0.417628 |
| 34               | 1                | 0              | 6.229431                | -0.576186 | 0.025421  |
| 35               | 1                | 0              | -1.339247               | -3.975045 | -1.930210 |
| 36               | 1                | 0              | 0.376907                | -2.284609 | -1.419016 |
| 37               | 1                | 0              | 3.559895                | -2.569173 | 1.688262  |
| 38               | 1                | 0              | -2.750502               | 5.403223  | 0.042647  |
| 39               | 1                | 0              | -1.261942               | 5.847154  | 0.864799  |
| 40               | 1                | 0              | -1.311938               | 5.831129  | -0.891275 |
| 41               | 8                | 0              | 1.061313                | -2.132833 | 1.835604  |
| 42               | 1                | 0              | 0.192224                | -1.713614 | 1.847202  |

-----

**Conformer B M06**

-----

| Center<br>Number | Atomic<br>Number | Atomic<br>Type | Coordinates (Angstroms) |           |           |
|------------------|------------------|----------------|-------------------------|-----------|-----------|
|                  |                  |                | X                       | Y         | Z         |
| 1                | 6                | 0              | 4.010156                | -1.468163 | 0.320511  |
| 2                | 6                | 0              | 2.991695                | -2.117694 | 1.006139  |
| 3                | 6                | 0              | 1.682415                | -1.672140 | 0.946212  |
| 4                | 6                | 0              | 1.344250                | -0.585596 | 0.129236  |
| 5                | 6                | 0              | 2.374404                | 0.078100  | -0.523056 |
| 6                | 6                | 0              | 3.691828                | -0.344083 | -0.424048 |
| 7                | 6                | 0              | -1.055886               | -1.007372 | -0.218435 |
| 8                | 6                | 0              | -0.905389               | -2.118249 | -1.036629 |
| 9                | 6                | 0              | -2.309698               | -0.744956 | 0.322736  |
| 10               | 6                | 0              | -1.387677               | 1.759879  | 0.641079  |
| 11               | 6                | 0              | -0.241254               | 1.251040  | 0.044396  |
| 12               | 6                | 0              | 0.623025                | 2.136544  | -0.587274 |
| 13               | 1                | 0              | 4.470123                | 0.211236  | -0.934282 |
| 14               | 6                | 0              | -1.974755               | -2.958934 | -1.278721 |
| 15               | 6                | 0              | -3.385595               | -1.572116 | 0.045624  |
| 16               | 1                | 0              | -4.357066               | -1.333402 | 0.465236  |
| 17               | 6                | 0              | -3.232560               | -2.703619 | -0.743353 |
| 18               | 7                | 0              | 0.013229                | -0.131849 | 0.050046  |
| 19               | 6                | 0              | -1.653487               | 3.119448  | 0.622012  |
| 20               | 6                | 0              | 0.381881                | 3.500480  | -0.560412 |
| 21               | 6                | 0              | -0.759912               | 4.010763  | 0.043462  |
| 22               | 1                | 0              | -2.568914               | 3.486573  | 1.072292  |
| 23               | 1                | 0              | 1.084833                | 4.172592  | -1.040039 |
| 24               | 6                | 0              | -1.013594               | 5.483379  | 0.079667  |
| 25               | 16               | 0              | -2.508405               | 0.631926  | 1.428088  |
| 26               | 16               | 0              | 2.001901                | 1.505333  | -1.508609 |
| 27               | 6                | 0              | -4.381000               | -3.626408 | -0.997352 |
| 28               | 1                | 0              | -4.321770               | -4.068501 | -1.992378 |
| 29               | 1                | 0              | -4.391635               | -4.450448 | -0.279815 |
| 30               | 1                | 0              | -5.336221               | -3.108773 | -0.910007 |
| 31               | 6                | 0              | 5.413980                | -1.974026 | 0.397241  |
| 32               | 1                | 0              | 5.679666                | -2.253961 | 1.417446  |
| 33               | 1                | 0              | 5.542668                | -2.864600 | -0.221967 |
| 34               | 1                | 0              | 6.126085                | -1.226122 | 0.050746  |
| 35               | 1                | 0              | -1.835262               | -3.826521 | -1.913448 |
| 36               | 1                | 0              | 0.063490                | -2.322357 | -1.476517 |
| 37               | 1                | 0              | 3.223617                | -2.975297 | 1.630600  |
| 38               | 1                | 0              | -2.081166               | 5.702584  | 0.091127  |
| 39               | 1                | 0              | -0.580889               | 5.933271  | 0.976213  |
| 40               | 1                | 0              | -0.569460               | 5.984562  | -0.780258 |
| 41               | 8                | 0              | 0.692097                | -2.253257 | 1.655350  |
| 42               | 1                | 0              | 1.049632                | -2.985661 | 2.166051  |

-----

**Conformer A M06-2X**

| Center<br>Number | Atomic<br>Number | Atomic<br>Type | Coordinates (Angstroms) |           |           |
|------------------|------------------|----------------|-------------------------|-----------|-----------|
|                  |                  |                | X                       | Y         | Z         |
| 1                | 6                | 0              | 4.186950                | -0.915600 | 0.278361  |
| 2                | 6                | 0              | 3.291055                | -1.676816 | 1.020656  |
| 3                | 6                | 0              | 1.934737                | -1.390975 | 1.012277  |
| 4                | 6                | 0              | 1.432111                | -0.367492 | 0.197243  |
| 5                | 6                | 0              | 2.338260                | 0.417905  | -0.505006 |
| 6                | 6                | 0              | 3.701952                | 0.157605  | -0.460153 |
| 7                | 6                | 0              | -0.876373               | -1.141189 | -0.174951 |
| 8                | 6                | 0              | -0.521342               | -2.217366 | -0.980342 |
| 9                | 6                | 0              | -2.177355               | -1.065548 | 0.320433  |
| 10               | 6                | 0              | -1.654182               | 1.543694  | 0.661784  |
| 11               | 6                | 0              | -0.424374               | 1.213810  | 0.104097  |
| 12               | 6                | 0              | 0.297758                | 2.201559  | -0.559070 |
| 13               | 1                | 0              | 4.384354                | 0.796915  | -1.004886 |
| 14               | 6                | 0              | -1.451268               | -3.202400 | -1.269777 |
| 15               | 6                | 0              | -3.111006               | -2.039764 | -0.005649 |
| 16               | 1                | 0              | -4.121766               | -1.949373 | 0.372604  |
| 17               | 6                | 0              | -2.758338               | -3.131433 | -0.791924 |
| 18               | 7                | 0              | 0.039713                | -0.118334 | 0.174555  |
| 19               | 6                | 0              | -2.136571               | 2.843984  | 0.597628  |
| 20               | 6                | 0              | -0.163524               | 3.510800  | -0.577839 |
| 21               | 6                | 0              | -1.382439               | 3.849766  | 0.003143  |
| 22               | 1                | 0              | -3.107886               | 3.070462  | 1.018305  |
| 23               | 1                | 0              | 0.425150                | 4.271143  | -1.075907 |
| 24               | 6                | 0              | -1.867423               | 5.272657  | -0.009030 |
| 25               | 16               | 0              | -2.594623               | 0.253987  | 1.431082  |
| 26               | 16               | 0              | 1.750685                | 1.775331  | -1.477185 |
| 27               | 6                | 0              | -3.753629               | -4.214994 | -1.101154 |
| 28               | 1                | 0              | -3.622736               | -4.586506 | -2.116518 |
| 29               | 1                | 0              | -3.626177               | -5.060650 | -0.423224 |
| 30               | 1                | 0              | -4.774647               | -3.853700 | -0.993854 |
| 31               | 6                | 0              | 5.653311                | -1.246070 | 0.286937  |
| 32               | 1                | 0              | 5.984049                | -1.530701 | 1.284829  |
| 33               | 1                | 0              | 5.859321                | -2.085819 | -0.378715 |
| 34               | 1                | 0              | 6.248567                | -0.399359 | -0.048762 |
| 35               | 1                | 0              | -1.157921               | -4.038370 | -1.891930 |
| 36               | 1                | 0              | 0.486267                | -2.280219 | -1.369541 |
| 37               | 1                | 0              | 3.638502                | -2.489227 | 1.645442  |
| 38               | 1                | 0              | -2.953278               | 5.316575  | 0.050810  |
| 39               | 1                | 0              | -1.464699               | 5.821851  | 0.843575  |
| 40               | 1                | 0              | -1.547864               | 5.787521  | -0.913521 |
| 41               | 8                | 0              | 1.122853                | -2.137754 | 1.799773  |
| 42               | 1                | 0              | 0.243099                | -1.742075 | 1.832899  |

**Conformer B M06-2X**

| Center<br>Number | Atomic<br>Number | Atomic<br>Type | Coordinates (Angstroms) |           |           |
|------------------|------------------|----------------|-------------------------|-----------|-----------|
|                  |                  |                | X                       | Y         | Z         |
| 1                | 6                | 0              | 4.069110                | -1.319315 | 0.312972  |
| 2                | 6                | 0              | 3.071929                | -2.025415 | 0.980000  |
| 3                | 6                | 0              | 1.746727                | -1.622399 | 0.926189  |
| 4                | 6                | 0              | 1.371300                | -0.524122 | 0.138196  |
| 5                | 6                | 0              | 2.377030                | 0.190210  | -0.501834 |
| 6                | 6                | 0              | 3.711577                | -0.188965 | -0.407832 |
| 7                | 6                | 0              | -1.008667               | -1.046466 | -0.207472 |
| 8                | 6                | 0              | -0.796471               | -2.158567 | -1.013774 |
| 9                | 6                | 0              | -2.280486               | -0.831883 | 0.318703  |
| 10               | 6                | 0              | -1.470738               | 1.707925  | 0.640948  |
| 11               | 6                | 0              | -0.294310               | 1.250798  | 0.054795  |
| 12               | 6                | 0              | 0.541416                | 2.174739  | -0.566352 |
| 13               | 1                | 0              | 4.468696                | 0.402915  | -0.905263 |
| 14               | 6                | 0              | -1.829479               | -3.046314 | -1.265402 |
| 15               | 6                | 0              | -3.319141               | -1.706607 | 0.030885  |
| 16               | 1                | 0              | -4.303813               | -1.506465 | 0.435660  |
| 17               | 6                | 0              | -3.106976               | -2.837530 | -0.750459 |
| 18               | 7                | 0              | 0.020691                | -0.122718 | 0.072204  |
| 19               | 6                | 0              | -1.794181               | 3.058085  | 0.622409  |
| 20               | 6                | 0              | 0.241961                | 3.529919  | -0.535759 |
| 21               | 6                | 0              | -0.932371               | 3.989020  | 0.052952  |
| 22               | 1                | 0              | -2.724945               | 3.384408  | 1.069022  |
| 23               | 1                | 0              | 0.925407                | 4.232432  | -0.996307 |
| 24               | 6                | 0              | -1.279096               | 5.452080  | 0.035282  |
| 25               | 16               | 0              | -2.540469               | 0.532217  | 1.421334  |
| 26               | 16               | 0              | 1.951958                | 1.607687  | -1.473891 |
| 27               | 6                | 0              | -4.220582               | -3.813363 | -1.012908 |
| 28               | 1                | 0              | -4.094678               | -4.299243 | -1.979245 |
| 29               | 1                | 0              | -4.238923               | -4.594654 | -0.250914 |
| 30               | 1                | 0              | -5.189654               | -3.317223 | -0.999434 |
| 31               | 6                | 0              | 5.498870                | -1.777675 | 0.382302  |
| 32               | 1                | 0              | 5.773529                | -2.047055 | 1.401619  |
| 33               | 1                | 0              | 5.649980                | -2.660086 | -0.241341 |
| 34               | 1                | 0              | 6.176486                | -1.000624 | 0.034957  |
| 35               | 1                | 0              | -1.642469               | -3.912038 | -1.888156 |
| 36               | 1                | 0              | 0.186860                | -2.327364 | -1.433107 |
| 37               | 1                | 0              | 3.331245                | -2.890654 | 1.579863  |
| 38               | 1                | 0              | -1.929394               | 5.710273  | 0.869039  |
| 39               | 1                | 0              | -0.382538               | 6.067124  | 0.091510  |
| 40               | 1                | 0              | -1.801331               | 5.712562  | -0.886818 |
| 41               | 8                | 0              | 0.767278                | -2.258482 | 1.614733  |
| 42               | 1                | 0              | 1.144116                | -2.990827 | 2.113475  |
